# Supplementary material for: The association of developmental trajectories of adolescent mental health with early-adult functioning
Source: PubMed Central journal article supplement (PMC7286481; doi:10.1371/journal.pone.0233648), 2020-06-10
Supplement: pone.0233648.s001.pdf [file pone.0233648.s001.pdf]

**Table 4.** Unadjusted and adjusted associations between the adolescent mental health trajectory classes (derived from the 6-class model) and early-adult functioning outcomes. The decreasing-low INT+EXT class (n=189) was used as a reference.

| Domain                                             | Continuous high INT+EXT<br>(n=221) vs. reference |                       | Decreasing, high<br>EXT/moderate INT (n=265)<br>vs. reference |                      | Continuous moderate<br>INT>EXT (n=303) vs.<br>reference |                      | Decreasing, moderate<br>EXT/low INT (n=368) vs.<br>reference |                      |
|----------------------------------------------------|--------------------------------------------------|-----------------------|---------------------------------------------------------------|----------------------|---------------------------------------------------------|----------------------|--------------------------------------------------------------|----------------------|
|                                                    | Unadj.                                           | Adj.                  | Unadj.                                                        | Unadj.               | Unadj.                                                  | Adj.                 | Unadj.                                                       | Adj.                 |
|                                                    | OR<br>(95% CI)                                   | OR<br>(95% CI)        | OR<br>(95% CI)                                                | OR<br>(95% CI)       | OR<br>(95% CI)                                          | OR<br>(95% CI)       | OR<br>(95% CI)                                               | OR<br>(95% CI)       |
| <b>Economic</b>                                    |                                                  |                       |                                                               |                      |                                                         |                      |                                                              |                      |
| Low educational level                              | 4.25<br>(1.41-12.84)                             | 4.15<br>(1.21-14.25)  | 3.10<br>(1.02-9.46)                                           | 1.18<br>(0.52-5.86)  | 1.91<br>(0.61-6.04)                                     | 1.81<br>(0.51-6.39)  | 1.61<br>(0.52-5.04)                                          | 3.31<br>(0.96-11.38) |
| Frequent absenteeism                               | 2.87<br>(1.18-6.94)                              | 2.44<br>(0.92-6.43)   | 1.51<br>(0.59-3.82)                                           | 1.51<br>(0.56-4.07)  | 1.37<br>(0.55-3.44)                                     | 1.33<br>(0.51-3.44)  | 0.84<br>(0.33-2.19)                                          | 0.96<br>(0.36-2.54)  |
| Receiving social<br>security benefits <sup>a</sup> | 3.19<br>(1.25-8.15)                              | 1.81<br>(0.62-5.31)   | 2.04<br>(0.78-5.34)                                           | 1.42<br>(0.48-4.18)  | 2.18<br>(0.86-5.56)                                     | 2.30<br>(0.82-6.41)  | 0.57<br>(0.19-1.71)                                          | 0.44<br>(0.13-1.45)  |
| Serious financial<br>difficulties <sup>a</sup>     | 14.47<br>(3.39-61.82)                            | 14.66<br>(3.25-66.04) | 7.58<br>(1.74-33.05)                                          | 8.53<br>(1.89-38.47) | 2.90<br>(0.62-13.60)                                    | 3.22<br>(0.67-15.46) | 1.49<br>(0.30-7.45)                                          | 1.63<br>(0.32-8.31)  |
| <b>Social</b>                                      |                                                  |                       |                                                               |                      |                                                         |                      |                                                              |                      |
| Early parenthood <sup>a</sup>                      | 2.99<br>(1.16-7.68)                              | 2.44<br>(.087-6.84)   | 2.18<br>(0.84-5.66)                                           | 2.44<br>(0.88-6.72)  | 0.83<br>(0.28-2.44)                                     | 0.71<br>(0.23-2.15)  | 0.57<br>(0.19-1.71)                                          | 0.68<br>(0.22-2.11)  |
| Multiple social<br>difficulties <sup>a</sup>       | 10.33<br>(4.29-24.85)                            | 9.84<br>(3.90-24.84)  | 4.60<br>(1.88-11.29)                                          | 5.25<br>(2.07-13.32) | 4.36<br>(1.79-10.58)                                    | 4.67<br>(1.88-11.64) | 2.90<br>(1.19-7.07)                                          | 3.58<br>(1.44-8.90)  |
| Delinquency                                        | 7.14<br>(2.72-18.77)                             | 8.49<br>(2.98-24.25)  | 4.96<br>(1.88-13.11)                                          | 4.53<br>(1.62-12.66) | 2.05<br>(0.74-5.72)                                     | 3.53<br>(1.22-10.25) | 4.97<br>(1.93-12.79)                                         | 4.24<br>(1.60-11.21) |
| <b>Health</b>                                      |                                                  |                       |                                                               |                      |                                                         |                      |                                                              |                      |
| Smoking                                            | 6.37<br>(2.77-14.67)                             | 6.41<br>(2.65-15.50)  | 4.68<br>(2.03-10.78)                                          | 4.56<br>(1.91-10.85) | 1.76<br>(0.72-4.29)                                     | 1.94<br>(0.78-4.82)  | 2.65<br>(1.15-6.11)                                          | 2.69<br>(1.16-6.29)  |

|                                     |                          |                        |                        |                       |                        |                        |                        |                      |                            |
|-------------------------------------|--------------------------|------------------------|------------------------|-----------------------|------------------------|------------------------|------------------------|----------------------|----------------------------|
| Problematic substance use           | Alcohol                  | 2.09<br>(0.83-5.21)    | 1.73<br>(0.63-4.77)    | 2.71<br>(1.13-6.46)   | 1.74<br>(0.68-4.48)    | 1.15<br>(0.45-2.96)    | 1.56<br>(0.58-4.20)    | 2.53<br>(1.10-5.85)  | <i>1.55</i><br>(0.65-3.71) |
|                                     | Cannabis                 | 5.84<br>(2.20-15.50)   | 10.07<br>(3.44-29.48)  | 3.97<br>(1.49-10.63)  | 5.14<br>(1.90-14.71)   | 0.61<br>(0.17-2.13)    | 1.13<br>(0.31-4.14)    | 2.88<br>(1.09-7.61)  | 2.58<br>(0.94-7.06)        |
| Suicidality                         |                          | 8.66<br>(1.98-37.96)   | 8.00<br>(1.62-39.39)   | 0.37<br>(0.03-4.06)   | 0.35<br>(0.03-4.11)    | 2.56<br>(0.54-12.20)   | 2.72<br>(0.53-13.96)   | 0.24<br>(0.02-2.71)  | 0.25<br>(0.02-2.83)        |
| Mental health concerns <sup>b</sup> | Unhappy /dissatisfaction | 11.77<br>(4.11-33.71)  | 13.18<br>(4.32-40.24)  | 3.92<br>(1.31-11.70)  | 4.61<br>(1.48-14.36)   | 5.88<br>(2.04-16.92)   | 6.40<br>(2.15-19.02)   | 2.80<br>(0.95-8.27)  | 3.12<br>(1.03-9.45)        |
|                                     | Poor sleep quality       | 13.17<br>(3.07-56.50)  | 13.69<br>(3.02-62.12)  | 4.22<br>(0.92-19.30)  | 4.78<br>(1.01-22.70)   | 10.84<br>(2.56-45.96)  | 11.77<br>(2.70-51.29)  | 2.50<br>(0.54-11.55) | 2.81<br>(0.60-13.19)       |
|                                     | Loneliness               | 24.32<br>(3.25-182.06) | 37.21<br>(4.71-293.89) | 10.08<br>(1.30-77.92) | 16.10<br>(2.02-128.60) | 14.93<br>(1.99-111.93) | 19.69<br>(2.56-151.55) | 0.97<br>(0.09-10.83) | 1.15<br>(0.10-12.99)       |
| Serious physical event <sup>a</sup> |                          | 4.10<br>(0.87-19.27)   | 3.71<br>(0.72-19.12)   | 3.81<br>(0.82-17.62)  | 4.20<br>(0.86-20.50)   | 2.21<br>(0.45-10.79)   | 2.21<br>(0.44-11.17)   | 1.73<br>(0.36-8.44)  | 1.86<br>(0.37-9.23)        |
| Obesity                             |                          | 2.64<br>(1.08-6.42)    | 1.48<br>(0.55-3.98)    | 2.04<br>(0.84-4.99)   | 1.59<br>(0.60-4.17)    | 1.44<br>(0.58-3.59)    | 1.04<br>(0.40-2.75)    | 1.26<br>(0.52-3.10)  | 1.28<br>(0.50-3.26)        |
| Poor subjective physical health     |                          | 14.23<br>(5.52-36.64)  | 14.38<br>(5.37-38.47)  | 5.67<br>(2.16-14.88)  | 6.70<br>(2.49-18.03)   | 8.91<br>(3.49-22.79)   | 8.54<br>(3.29-22.20)   | 3.44<br>(1.32-9.00)  | 4.10<br>(1.55-10.86)       |

Note. OR=odds ratio, 95% CI=95% confidence interval, INT=internalizing, EXT=externalizing, Unadj.=unadjusted model, Adj.=adjusted model (covariates were: childhood functioning, sex, IQ, temperament (effortful control, fear, frustration), family SES, parenting stress, perceived parenting (warmth and rejection), and current mental health).

Covariates printed in *italic* had a protective effect as indexed by an OR<1

<sup>a</sup>adjusted analyses controlled for all covariates except childhood functioning data

<sup>b</sup>adjusted analyses controlled for all covariates except current mental health

**Table 4.** Continued

|                                                    | Increasing, EXT>INT<br>(n=178) vs. reference |                      | Explained<br>variance<br>(R <sup>2</sup> ) |      | Estimates (OR; 95%<br>CI) for INT and EXT            |
|----------------------------------------------------|----------------------------------------------|----------------------|--------------------------------------------|------|------------------------------------------------------|
|                                                    | Unadj.                                       | Adj.                 | Unadj                                      | Adj. |                                                      |
| Domain                                             | OR<br>(95% CI)                               | OR<br>(95% CI)       |                                            |      |                                                      |
| <b>Economic</b>                                    |                                              |                      |                                            |      |                                                      |
| Low educational level                              | 4.23<br>(1.36-13.17)                         | 4.14<br>(1.23-13.92) | .03                                        | .30  | INT: 6.47 (1.86-22.54)<br>EXT: 1.93 (0.52-7.18)      |
| Frequent absenteeism                               | 0.63<br>(0.18-2.20)                          | 0.73<br>(0.21-2.61)  | .03                                        | .09  | INT: 2.85 (0.89-9.17)<br>EXT: 2.30 (0.60-8.82)       |
| Receiving social<br>security benefits <sup>a</sup> | 1.33<br>(0.44-4.04)                          | 1.07<br>(0.32-3.55)  | .05                                        | .29  | INT: 7.65 (2.51-23.38)<br>EXT: 6.27 (1.84-21.35)     |
| Serious financial<br>difficulties <sup>a</sup>     | 7.28<br>(1.60-33.11)                         | 7.54<br>(1.62-35.01) | .11                                        | .17  | INT: 2.21 (0.64-6.40)<br>EXT: 4.83 (1.44-16.20)      |
| <b>Social</b>                                      |                                              |                      |                                            |      |                                                      |
| Early parenthood <sup>a</sup>                      | 1.33<br>(0.44-4.04)                          | 1.57<br>(0.49-4.99)  | .05                                        | .17  | INT: 0.79 (0.20-3.14)<br>EXT: 4.69 (1.10-19.99)      |
| Multiple social<br>difficulties <sup>a</sup>       | 5.49<br>(2.18-13.84)                         | 6.43<br>(2.49-16.65) | .07                                        | .16  | INT: 1.03 (0.43-2.47)<br>EXT: 10.74 (4.13-<br>27.93) |
| Delinquency                                        | 7.54<br>(2.82-20.14)                         | 6.37<br>(2.30-17.59) | .06                                        | .19  | INT: 0.22 (0.07-0.68)<br>EXT: 21.32 (7.34-<br>61.92) |
| <b>Health</b>                                      |                                              |                      |                                            |      |                                                      |
| Smoking                                            | 4.67<br>(1.95-11.17)                         | 4.29<br>(1.77-10.43) | .06                                        | .12  | INT: 0.26 (0.09-0.74)<br>EXT: 5.37 (1.97-14.66)      |

|                                     |                          |                      |                      |     |            |                                                  |
|-------------------------------------|--------------------------|----------------------|----------------------|-----|------------|--------------------------------------------------|
| Problematic substance use           | Alcohol                  | 3.51<br>(1.43-8.57)  | 2.32<br>(0.91-5.91)  | .03 | <i>.13</i> | INT: 0.21 (0.05-0.86)<br>EXT: 3.90 (1.19-12.78)  |
|                                     | Cannabis                 | 7.42<br>(2.78-19.82) | 7.34<br>(2.63-20.49) | .09 | <i>.21</i> | INT: 1.07 (0.34-3.32)<br>EXT: 5.28 (1.80-15.51)  |
| Suicidality                         |                          | 1.17<br>(0.28-10.39) | 1.61<br>(0.25-10.29) | .15 | <i>.28</i> | INT: 7.26 (1.75-30.18)<br>EXT: 2.90 (0.52-16.23) |
| Mental health concerns <sup>b</sup> | Unhappy /dissatisfaction | 5.20<br>(1.70-15.86) | 5.91<br>(1.88-18.55) | .07 | <i>.17</i> | INT: 15.94 (6.43-39.51)<br>EXT: 1.05 (0.36-3.01) |
|                                     | Poor sleep quality       | 5.85<br>(1.26-27.20) | 6.12<br>(1.29-29.06) | .08 | <i>.17</i> | INT: 6.11 (2.22-16.86)<br>EXT: 2.63 (0.78-8.89)  |
|                                     | Loneliness               | 8.06<br>(0.98-66.37) | 9.63<br>(1.15-80.83) | .13 | <i>.22</i> | INT: 17.54 (5.76-53.38)<br>EXT: 1.42 (0.36-5.56) |
| Serious physical event <sup>a</sup> |                          | 2.27<br>(0.41-12.57) | 2.14<br>(0.38-12.13) | .02 | <i>.09</i> | INT: 1.03 (0.20-5.42)<br>EXT: 4.16 (0.75-23.09)  |
| Obesity                             |                          | 1.28<br>(0.45-3.62)  | 0.92<br>(0.29-2.88)  | .02 | <i>.18</i> | INT: 1.01 (0.29-3.49)<br>EXT: 3.44 (0.93-12.68)  |
| Poor subjective physical health     |                          | 8.04<br>(3.02-21.39) | 9.37<br>(3.46-23.38) | .09 | <i>.16</i> | INT: 5.92 (2.63-13.31)<br>EXT: 0.70 (0.32-2.15)  |

Note. OR=odds ratio, 95% CI=95% confidence interval, INT=internalizing, EXT=externalizing, Unadj.=unadjusted model, Adj.=adjusted model (covariates were: childhood functioning, sex, IQ, temperament (effortful control, fear, frustration), family SES, parenting stress, perceived parenting (warmth and rejection), and current mental health).

Covariates printed in *italic* had a protective effect as indexed by an OR<1

<sup>a</sup>adjusted analyses controlled for all covariates except childhood functioning data

<sup>b</sup>adjusted analyses controlled for all covariates except current mental health
